# Supplementary material for: The extratropical tropopause inversion layer and its correlation with relative humidity
Source: Copernicus journal article supplement (doi:10.5194/egusphere-2023-2440), 2023-11-21
Supplement: Supplementary file [file egusphere-2023-2440-AC1-supplement.pdf]

# Reply to Reviewer

We thank both referees for their insightful reviews and helpful and constructive comments. This improved the quality of the manuscript.

We have taken the suggestions and criticism as an opportunity to structure the manuscript more clearly. In doing so, we have concentrated on explaining in more detail why we examine the TIL together with the relative humidity with respect to ice. This is expressed, among other things, in a changed title as well as in a detailed discussion of relative humidity w.r.t. ice as an important parameter when analyzing the tropopause region. We also included a discussion on different tropopause definitions.

In the following, we answer to the comments point by point. *Questions and remarks of the reviewers are marked in orange*, reply of the authors are marked in black and *changes to the manuscript are marked in blue*.

## Reviewer #1

The paper deals with the correlation between TIL properties and relative humidity in a few kilometers thick layer around the tropopause. The authors mention two theories or hypotheses that explain the strong stability maximum that is found in high-resolution profiles at the tropopause, namely a dynamic and a radiative mechanism. Their results seem to support both theories, but not always simultaneously at the same location and season.

It is not clear to me whether supporting one or both of these theories was the motivation of the study; this is not clearly stated. And it seems to have been not so clear to the authors as well, as it is never clear what the correlations actually mean. Sometimes the text seems to indicate that high relative humidity CAUSES a strong (but thin) TIL, but a corresponding mechanism is not mentioned. Furthermore, if the radiation mechanism is in focus, it should be the radiation extinction and emission by the water molecules that is important, that is, it is the absolute rather than the relative humidity one should look at. If, however, the dynamical mechanism is in focus, consideration of the relative humidity is probably the correct choice since vertical motions lead to increasing relative humidity.

In any case, I miss the description of mechanisms, that explain or at least suggest how water molecules, either in absolute number or as relative humidity, are involved in the formation of the TIL by either radiation or dynamics.

The paper thus needs a major revision before it can be accepted for publication. Below I give some further suggestions for improvements.

Major points:

Section 3.1.1:

Why do you use the simple differences  $E(x)-R(x)$ ? This may average out to quite small values and you think everything is ok, where in reality you might have large local differences. Usually, therefore, other measures are used that avoid such cancellation effects, e.g. RMSE, mean ABSOLUTE difference etc. I think, to convince the reader, it is necessary that these traditional standard measures are used instead of the simple average distance. This will certainly broaden your histograms in figures 4 and 5, and perhaps modify or change your conclusions.

We have replaced the difference plots with plots of the average absolute difference based on the new equation 8.

$$\bar{D}_{\text{abs}}(\chi) := \frac{1}{z' - z_0} \int_{z_0}^{z'} |E(\chi) - R(\chi)| dz \approx \frac{1}{z' - z_0} \sum_{z_0}^{z'} |E(\chi(z)) - R(\chi(z))| \Delta z \quad (8)$$

This affects the distributions of the deviations, i.e. Figures 4,5 and 6, and the interpretation of the results. The text was partly rewritten. We also added following discussion to the manuscript:

*We chose a metric including absolute values of differences in order to avoid undesired cancellation effects of positive and negative contributions. In this sense, we used a metric inspired by the L1-norm. Thus, the resulting distributions are expected to be skew and might have (exponential) decaying tails. The resulting data set is visualized in a probability bar chart and the corresponding median, mean and standard deviation for the different variables are presented in figures 4, 5, and 6, respectively.*

Lines 218 ff: another difficulty arises from averaging over the profiles: In this paragraph a shift to higher values of RHi in ERA5 is explained with details of the humidity gradient at the TP. While this is a plausible explanation, it cannot be seen from averaged profiles. Here it would help to split the data into data below the TIL and above the TIL. Finally, please think whether the quoted values are actually as precise as given (e.g. 10.318).

We revised this investigation of the data; the newly introduced metric with absolute values of differences does not allow some interpretations as stated in the former version. However, the data is already split into tropospheric and stratospheric data, leading to different deviations. It would be difficult or even impossible to split the data in “above” and “below” the TIL, since it is not clear, which reference level should be taken into account.

We reduced the precision of the given values to two decimal places.

Section 3.2.1: I see that the mean T-difference at the TP between strong and weak TIL cases is about 10K, and this difference is almost constant throughout the 3 km below the TP. If a strong TIL has a higher TP, one can estimate a height difference of 1-1.5 km (according to usual lapse rates). This means, the T-difference applies in the whole profile at least 1.5 km down from the TP. Your argument in line 257, that there should be a stronger T-gradient, is weak, because it seems that the T-gradient (on average) is the same in all TIL-classes. A similar observation can be made for the RHi profiles. The higher RHi in the strong TIL case is already present at least 1.5 km below the TP. So the question here is, why and how the TIL is affected by profile characteristics that begin at least 1.5 km below the TP. You should also consider the absolute humidity, q. From what I see, I expect that a strong TIL is correlated to the lowest values of q and vice versa. This might be important for the question how radiation can affect the TIL. The argument, that high RHi at the TP may result from vertical motion, is reasonable, but it weakens your statement from above that radiation might cause the sharpness of the TIL. I suggest to go back and to downplay this argument. This would also strengthen the justification to focus on relative than on specific humidity (which does not change in vertical motions).

We agree that the interpretation of the colder temperature profile in terms of a stronger or weaker TILs is not very strong. We have added some text to clarify this. However, this is not the major result of the study; the correlation between RHi and TIL strength is the more relevant result, which is not affected by this interpretation.

We added a detailed discussion in the introduction, why we think that the relative humidity with respect ice is well suited for this investigation:

*In a recent model study, Kunkel et al. (2016) were able to show that the formation of the TIL is probably driven by a combination of different adiabatic and diabatic processes. In a first step, evolving baroclinic instabilities lead to a compression of isentropes, which in turn results into sharper gradients of the stability. Relevant processes in this respect are horizontal convergence in anticyclonic regions, strong upward motions, e.g. triggered by convective instabilities, and gravity waves triggered by the large scale flow, respectively. Since these*

*changes are mostly adiabatic and thus reversible in general, in a second step diabatic processes as turbulence/mixing, cloud formation and resulting latent heat release and radiative heating/cooling by trace gases (as water vapor) modify the TIL irreversible. As showed by Kunkel et al. (2016), the diagnostics of these processes is quite difficult and from measurements it might be quite impossible to disentangle the contributions of the different processes.*

*However, by careful inspection of the scenario, there is a quantity, which might be considered as a proxy for these different processes.*

*The relative humidity (with respect to a stable phase of water, i.e., liquid or solid) is the control variable for many cloud processes. On the other hand, this variable, as combined by the mass concentration of water vapor, pressure, and temperature, is a good indicator for adiabatic expansion processes (i.e. cooling); high values of RH can be expected if moist air is adiabatically lifted. In the tropopause region within the low temperature regime (i.e.  $T < 235$  K), relative humidity over ice (RH<sub>i</sub>) is the relevant quantity, since solid ice is the stable phase there. Thus, RH<sub>i</sub> might be a good indicator for the strong lifting of air masses in baroclinic instabilities, thus working as a proxy for strong TILs.*

*Water vapor is a strong greenhouse gas, especially in the infrared range; the absolute concentration of water molecules controls the amount of emission and absorption. Particularly in case of a moist layer we would expect a strong emission of energy in the infrared spectrum, and thus a cooling of the layer. However, the total amount of water molecules is not the only reason for strong emissions. Since the atmosphere is layered, the concentration of water vapor in adjacent layers is also of importance. If the layers of different temperatures have a similar amount of water vapor, the emitted radiation is easily absorbed by the layers on top. Thus, a strong gradient in concentration (e.g. a layer with low concentration on top of a layer with high concentration) leads to a much stronger cooling rate than in a situation with weak gradients. Since it is difficult to measure (or determine) the gradient in water vapor concentrations, a good compromise is the use of relative humidity. Since it is linear in the water vapor concentration, it represents the gradients in a meaningful way. Because of small temperature changes in adjacent layers with strong vapor gradients, the impact of the temperature is quite negligible. For the tropopause region, this phenomenon was investigated in a study by Fusina and Spichtinger (2010); a stronger gradient in RH<sub>i</sub> leads to a much more pronounced cooling on top of the moist layer.*

*In summary, the use of relative humidity over ice in the tropopause region might help to detect strong TILs. Or in other words, correlations between high values of RH<sub>i</sub> and strong TILs would corroborate the two step formation of TILs with adiabatic and diabatic components. Therefore the use of RH<sub>i</sub> is highly relevant for the investigation of the tropopause inversion layer.*

#### **Minor points:**

**Line 67: Why explains the latitude of Idar Oberstein that the geopotential height is close to the geographic height?**

Due to the greater acceleration by gravity at the poles, the geopotential at the same altitude is greater there than at lower latitudes. At a latitude of 45°N, the geopotential height corresponds to the geometric height. We therefore find it sufficient to apply this assumption to a latitude of 50°.

L 70: Why are profiles discarded when they end before 20 km? The tropopause in Idar Oberstein probably never reaches such an altitude.

As we are not only looking at profiles at the Idar-Oberstein site in this study, but also in other regions, we wanted to use a uniform threshold value in order to include individual cases with higher tropopause levels in the statistics. Since the determination of the parameters requires that data must still be available at least 3 km above the thermal tropopause, we think that 20 km is justified as a minimum requirement for a homogeneous data set. Usually the radiosondes can reach this altitude range without problems, so it is not a major limitation.

L 77-78: Are the Miloshevich corrections applicable for the RS92 and RS41? And how large are the corrections on average?

The corrections are applicable for the RS92. Due to the small subset of RS41 ascents, we have treated the profiles as equivalent to the RS92 ascents. Since the differences in the extratropics between the two probe types are very small (<https://www.vaisala.com/sites/default/files/documents/RS-Comparison-White-Paper-B211317EN.pdf>), we think the application of the correction is justified. The corrections are in the order of 5% in humid and 20% in dry conditions.

L 80ff: This sentence is a bit misleading. It is not "past model forecast" but rather recalculation (hindcast) of the past weather with a recent version of the forecast model. Further, the vertical dimension is represented by rather than calculated on sigma coordinates.

You are right. We reformulated the sentences in the manuscript

*ERA5 is the most recent reanalysis product of the ECMWF (Hersbach et al., 2020). The reanalysis is a mix of a recalculation of past weather with one fixed forecast model version (IFS CY41R2) and assimilated measurements made for each available time. The high resolution data set has a horizontal resolution 0.25° in longitude and latitude. The vertical dimension of the atmosphere is represented by hybrid sigma/pressure (model) levels in ERA5 (ECMWF, 2020), the number of levels is 137 of which only levels up to the lower stratosphere are used.*

L 106 ff: see above. If it is cloud formation, then RH<sub>i</sub> is the natural variable to choose. However, if it is radiation, it should be the absolute water vapour concentration that regulates the optics.

We would like to refer to the extended discussion on the use of RH<sub>i</sub> in the introduction. See also reply to your comment on Section 3.2.1

Section 2.2.1: I am not sure whether this section is actually needed. The equations are textbook knowledge, and it probably suffices to write a few sentences instead of a subsection. The approach for the numerical treatment of the derivation should, however, be retained, as this is essential for the paper. The other details are not actually needed here (they might be important elsewhere, though). The lead away from the topic of the paper.

We think that this section makes sense because of the reproducibility. As shown in Murphy and Koop (2005) or Baumgartner et al. (2020), it is important which parameterizations are used for the calculation of essential quantities such as saturation vapor pressure or heat capacity, even if the deviations in the specified temperature and humidity range appear small.

L 153 ff: This remark should be removed. First, the reader cannot see what in the WMO definition requires to look "broadly" or at large scale at the system, and second, the potential effects of this "tacit" assumption are then ignored, for whatever reason. This puzzles the reader and leads away from the central topic.

We added a discussion on tropopause definitions in the new section 2.3.1. For the sake of readability, we will not show this section in this document. The reader is referred to the manuscript.

L 165 ff: For WHICH averaging process? It comes out of the nothing. I have no clue what happens here.

AND

L 168 ff: and it does not get clearer. It seems that you average your 10000 or so profiles, but that is not so clear to me. Here is the place to provide more details.

We tried to clarify, why we do the averaging and rewrote this part in the manuscript

*In order to be able to compare the large number of radiosonde data and ERA5 profiles, a tropopause-centered coordinate system was introduced. For this purpose, the thermal tropopause is identified in each radiosonde and ERA5 profile for Idar-Oberstein and defined as the tropopause height  $TP_z$ . This means that all profiles now live in the same coordinate system and can be averaged to obtain mean profiles of temperature, humidity and static stability. Therefore, we introduce a new height variable  $z_{TP} = z - TP_z$  (6) relative to the tropopause height  $TP_z$  (as derived by the WMO criterion, see above). Negative altitude values  $z_{TP}$  denote the upper troposphere, whereas positive altitude values  $z_{TP}$  represent the lower stratosphere. For the averaging process the single profiles are transformed into the  $z_{TP}$  coordinate system and the arithmetic mean of a meteorological variable  $\chi \in \{\text{temperature, relative humidity, static stability}\}$  is calculated, summing over all profiles at a certain height. The mean profiles relative to tropopause height of temperature, static stability ( $N^2$ ), and RH can be seen in Figure 2 for the radiosonde measurements (black) and the corresponding ERA5 data set (red) at the location of Idar-Oberstein. Even for the mean profiles the characteristics of the TIL, i.e., the strong increase in  $N^2$  at around  $TP_z$  can be seen clearly, as described in the next section.*

L 236 ff: Please reformulate. I think, one should not write that the LS is "more unstable" ... or "too unstable". The word "unstable" should be avoided when it is about the LS.

We agree. We used "less stable" instead of "more unstable" throughout the manuscript.

L 301 ff: If you write "a moist upper troposphere is sharpening the TIL", I think you must at least have a mechanism for the very process in mind and you must tell the reader how it works. But if you only find a coincidence (that is, by the way, a better word describing what you have than correlation, which has a mathematical definition), you should only write that there is a coincidence and avoid the impression that there is a certain process causing high relative humidity to sharpen the TIL.

We agree and rewrote this part.

*In summary, it can be seen that the drier the air is in this region, the thicker the TIL is. In other words, a moist upper troposphere coincides with a decreased depth of the TIL. In combination with the findings from the section before, we can conclude, that for a more humid upper troposphere, we can find a stronger but vertically more confined TIL feature.*

L 324/325: Again, please reformulate. You found a coincidence, but nothing shows that the humidity has an influence on the TIL.

We agree and rewrote this part.

*To summarize, the co-occurrence of high values of humidity with strong values for  $sTIL$  is a robust feature of the extratropics.*

L 327-329: Check the sentence. It sounds ugly. And it again indicates the RH somehow acts physically on the TIL.

We have reformulate the sentence.

*This section deals with the seasonal variation of the tropopause inversion layer, which is also discussed in the literature. It was found that the interplay of water vapor on the static stability in the UTLS region occurs on seasonal time scales (Kunz et al., 2009; Hegglin et al., 2009)*

L 347-348: If water vapour has this cooling effect, shouldn't then the absolute humidity be high? Can you show this?

Generally, it is the total amount of water molecules which determines the absorption and emission of infrared radiation. If the temperature variation is small, then relative humidity is directly proportional to the water vapor concentration, thus RH<sub>i</sub> is directly linked to the emission/absorption. However, if adjacent layers are investigated, the vertical gradient plays a major role (see Fusina & Spichtinger, 2010). Even in this case, RH<sub>i</sub> can be used for the quantification, since again the temperature variation is small.

L 365/366: "The winter/summer similarity further support the idea that radiative and baroclinic forcing can have similar amplifying effects." Please explain this statement.

Due to the lower baroclinic activity, the radiative effect is dominant in summer, while the opposite is the case in winter. Despite this difference, there is a similar enhancement of TIL with higher humidities, which is more likely to be attributed to the radiative mechanism in summer, while baroclinic activity is more likely the cause in winter.

L 413: the word "confirm" is too strong. I would say your data do not contradict these hypotheses and would be expected in one or both of the scenarios.

We agree and reformulated the sentence.

*The regional and seasonal analysis also showed the indication of the two suggested forcing mechanisms, the dynamical forcing by Wirth and Szabo (2007) and the radiative forcing by Randel et al. (2007).*

L 415 and L 417: "this is supporting...", again I think, this is too strong and should be reformulated.

We respectfully disagree, we think that the wording reflects our interpretation quite well.

Miscellaneous:

Line 26: hypotheses

We corrected this in the manuscript.

L 27: analyses, a stronger

We corrected this in the manuscript.

L 59: radiosonde soundings

We corrected this in the manuscript.

L 69: focusses

We corrected this in the manuscript.

L 72: replace "unscientific" with "unrealistic". The threshold values still appear quit high. Would 400 K be more realistic, or 200% RH?

We rewrote this part to

*419 profiles are discarded, 311 due to insufficient maximum height, 19 due to missing data and 89 due to unreliable values of temperature and relative humidity.*

Actually, we leave the exact thresholds out, since the nonphysical values are such high that they just exceed all relevant values. Thus, it is not really important which exact value is used.

L 86: radiosonde (twice)

We corrected this in the manuscript.

L 88: What is the difference between PHI\_g and PHI\_p?

That was a typo and will be corrected in the manuscript.

Section 2.1.3: The words consistent and inconsistent are slightly out of place. What is a "consistent spacing"? I assume you mean that the two data sets are interpolated on the same grid, isn't it. Later: "inconsistent with respect to time"? Here I am lost. Please reformulate.

We agree and have reformulated these sentences.

*A regular grid leads to a evenly spacing between data points, which in in turns allows for a cleaner statistical analysis. The base of the regular grid is the geometric height z.*

*By converting the ERA5 data from a pressure grid to a grid with the geometric height z, the latter grid changes from one point in time to the next with each atmospheric state.*

L 98: set (not sets)

L 123: Insert a paragraph break before "Potential temperature".

We have corrected this.

L 141: radiosonde

We have corrected this.

L 172: is the TIL indeed a measure? I suggest to simply delete this unnecessary sentence. Start with the second sentence.

We omitted this sentence.

L 175: I would agree that the importance of the TIL is that it is a tranport barrier. But what has it to do with any kind of diagnostics? Please reformulate.

We reformulated that sentence.

*The high stability in the TIL region represents a barrier to vertical motion (Gettelman et al., 2011) and is therefore important for understanding the composition of the air in the upper troposphere and lower stratosphere.*

L 181: diagnostics

We have corrected this.

L 190: is quite robust DUE TO small scale variations? What do you mean?

Instead of "is quite robust due to small scale variations" we meant "is quite robust due to small scale VERTICAL variations".

This was in comparison with the RH gradient (gRHi), which is sensitive to the combination of dry and wet vertical layers while the mean relative humidity wRHi is not. However, we have omitted this sentence as it is misleading.

L 194: delete "measured"

We have corrected this.

L 229: criterion

We have corrected this.

L 346: season is

We have corrected this.

L 355: the word "performed" does not fit here

We rewrote this sentence, also due to remarks of reviewer #2

By design the central USA location was introduced to include a region of frequent deep convection in the extratropics. There, significantly higher CAPE values are present in the summer months compared to the other regions (Taszarek et al., 2021), indicating greater deep convection activity. This leads to a stronger seasonal cycle in the vertical profiles in this region.

L 401: Like above: avoid the word "unstable" when speaking about the stratosphere

We changed it to "less stable"

L 415: its

We have corrected this.



## Reviewer #2

This is a good paper. It addresses the formation mechanism of the extratropical tropopause inversion layer (TIL) and the different forcing mechanisms of the TIL discussed in the literature (Randel et al., 2007; Wirth and Szabo, 2007). Here baroclinic waves and radiative (H<sub>2</sub>O) processes are relevant, but the time scales involved should not be ignored (and they might be different for the two mechanisms). Does the analysis provided here allow statements about radiative/dynamical time scales?

The paper is based on high-resolution radiosonde data from Idar-Oberstein (but give location (lat/lon) at first mention, and the relevant time period) with ERA5 data. This is good. However, I would emphasise differences as well as similarities between ERA5 and the sondes (see below).

The paper then moves on to investigate the influence of relative humidity with respect to ice (i.e. H<sub>2</sub>O) on the extratropical TIL. Further, based on ERA5, longitudinal and seasonal variability of the TIL is discussed. But the paper should be quantitative and more accurate (and less vague) than saying something like “. . . reveal consistent relationships in various extratropical regions of the Northern Hemisphere under different meteorological conditions”.

I am not sure if the authors agree with the assessment in this review – they do not need to do so. But a much clearer message of the paper would be very helpful. This is not clear from the present draft – in particular not in the title and the abstract. I think the paper would be more valuable if the message would be much clearer in a revised version.

Finally, while I am mentioning papers here that might be potentially of interest (and some already cited), I am certainly not suggesting the citation of particular papers.

Overall, I think this is a good helpful paper of interest to the readership of ACP. I suggest a major restructuring to make the key points of the paper clearer and more accurate in a revised version.

### Comments in detail

#### Abstract and title

There are guidelines for ACP papers, in particular the title, abstract, and concluding section: [https://www.atmospheric-chemistry-and-physics.net/policies/guidelines\\_for\\_authors.html](https://www.atmospheric-chemistry-and-physics.net/policies/guidelines_for_authors.html)  
Titles should be concise and consistent with the content and purpose of the article. For research articles, ACP prefers titles that highlight the scientific results/findings or implications of the study. Abstracts should have fewer than 250 words – I think the paper can be improved in this respect.

We changed the title of the manuscript to

[Relative humidity over ice as a key variable for Northern hemisphere extratropical tropopause inversion layers](#)

We also rewrote the abstract to highlight our findings.

The paper should be very clear what the main findings are and what the advance of knowledge of the study is.

#### Comparison of ERA5 and a radiosonde station

As I understand the paper, the basis of the paper is a comparison between the TIL in ERA5 and in the data from a radiosonde station. After a ‘validation’ of the ERA5 data with the radiosonde data, further conclusions for the TIL in the latitude range of the station are drawn.

This is good, but the paper is not very clear about this. The station is called “Idar-Oberstein”, sometimes only “Germany” is mentioned, the period of radiosonde data is often not mentioned, on

other occasions the latitude/longitude of the station is mentioned – all the information is in the paper, but the reader should not be forced to search the entire paper to find the necessary information.

Most importantly, as I read the paper the results are relevant for northern hemisphere mid-latitudes (close to 50°N) – is this correct?. If the authors agree, this fact should be evident in the paper, in particular abstract and title.

We reformulated the text in the manuscript to make all these points clearer.

## Tropopause

The entire concept of the TIL is based on using tropopause relative coordinates. Yes, this is reported on page 7 of the manuscript, but I suggest making this concept clear upfront. Further, determination of the tropopause is not straightforward (e.g., in ERA5), there is an extensive discussion in a recent publication (Hoffmann and Spang, 2022); this publication also addresses the issue of a fixed pressure grid and different interpolations, which might be helpful here.

Moreover, on page 6 of the manuscript, the classic WMO definition of the lapse rate tropopause is cited, however this definition leaves room for interpretation (Maddox and Mullendore, 2018). Exactly which definition of the lapse rate tropopause has been used? As stated in the paper the classic WMO definition is old and does not necessarily take into account the use of more recent gridded and high resolution data (see e.g., Reichler et al., 2003).

The authors mention the review by Gettelman et al. (2011), which is good. However, there are also other reviews of the determination of the tropopause (Hoinka, 1997) and there is also a tropopause definition based on isentropic potential vorticity gradients (Kunz et al., 2011).

This comment triggered the addition of a longer section on tropopause definitions in the (new) section 2.3.1. For the sake of readability, we will not show this section in this document. The reader is referred to the manuscript.

## Figs. 1, 2 and 3

First, I find these figures very helpful, they explain the concepts used here before more general statements are made.

However, I suggest that the scheme in Fig. 3 is closer to reality (Fig. 2); the static stability is not constant with altitude (above 11.25 km) and the kink at 11.25 km in Fig. 3 is not seen in the real data (Fig. 2).

Actually, the scheme in figure 3 is quite realistic, the features mentioned in the scheme (minima and maximum in  $N^2$ ) can be seen in the real-world example as represented in figure 2. We adjusted the scheme a little bit according to the realistic data, but the main features remain.

Further, I like Fig. 2 a lot, but I cannot see why an interpolation to a fixed altitude grid is necessary to produce the figure – doesn't the interpolation introduce an unnecessary smoothing? Most importantly, likely, the difference between sonde and ERA5 that I see in Fig. 2, is an important result. If I were an author, I would flag this result more strongly and more quantitatively in the paper (e.g. abstract, conclusions).

Since the interpolation is more or less a projection on a finer grid, smoothing is not an issue. We added some text to the description of the figure. However, the detailed description of the differences between RS and ERA5 is given in section 3.1.1.

Note, that the real profile of high resolution data (radiosonde and ERA5) as represented in Figure 1 includes all the features of the scheme shown in Figure 3 (UT minimum of  $N^2$ , maximum of  $N^2$ , LS minimum of  $N^2$ ). After averaging over many tropopause-centered profiles, some features might be lost in the mean profiles (e.g. Figure 2), although they are still visible in the single profiles – otherwise the profiles would be discharged in the analysis.

## Equation 8

In Equation 8, a measure is defined for the deviation between ERA5 and the sondes. However, this definition is not unique. It is a choice, isn't it? The problem I see is that deviations between E and R could cancel out when integrated over a certain altitude range. That is locally there could be a substantial deviation between E and R, but  $\bar{D}$  could be rather small, depending on how the range  $z' - z_0$  was chosen. Why are no absolute values considered of the deviation between E and R?

We have replaced the difference plots with plots of the average absolute difference based on the new equation 8.

$$\bar{D}_{\text{abs}}(\chi) := \frac{1}{z' - z_0} \int_{z_0}^{z'} |E(\chi) - R(\chi)| dz \approx \frac{1}{z' - z_0} \sum_{z_0}^{z'} |E(\chi(z)) - R(\chi(z))| \Delta z \quad (8)$$

This affects the distributions of the deviations, i.e. Figures 4,5 and 6, and the interpretation of the results. The text was partly rewritten. We also added following discussion to the manuscript:

*We chose a metric including absolute values of differences in order to avoid undesired cancellation effects of positive and negative contributions. In this sense, we used a metric inspired by the L1-norm. Thus, the resulting distributions are expected to be skew and might have (exponential) decaying tails. The resulting data set is visualized in a probability bar chart and the corresponding median, mean and standard deviation for the different variables are presented in figures 4, 5, and 6, respectively.*

## Minor issues

- I. 10: I would not use the term “strong agreement” when two temperature profiles (say) are very similar.

See next issue below.

- I. 10: “geographical”: what is meant here is the longitudinal variation. Correct?

We rewrote this sentence to:

*The shown correlation between radiosondes and ERA5 enables us to use ERA5 for seasonal analyses on different longitudinal regions in the northern extratropics.*

- I. 18: “distinct and intriguing feature known as the tropopause inversion layer”: here it would be helpful to report particular features of the TIL, rather than saying “intriguing”. What are the most relevant properties of the TIL? Such information comes later in the introduction, but it would be good to have this up front.

We rewrote this sentence to:

*At its upper boundary to the adjacent stratosphere, the troposphere encounters a strong temperature inversion known as the tropopause inversion layer (TIL)*

- I. 25: why “inert substances” ? Isn't the TIL a barrier for vertical transport even if substances are not chemically inert?

That is correct. We omitted the word “inert” in the manuscript. We also rewrote the sentence, see comment for L 175.

- “hypothesis” should be plural

Yes, we have corrected it to *hypotheses*.

- I. 51: give latitude and longitude of Idar-Oberstein

We added lat and lon here. More location details are given in Sec. 2.1.1 as well.

- I. 52: radiosonde data (not “sondes”)

We have corrected this.

- I. 69: focuses

We have corrected this.

- I. 72: these thresholds look somewhat arbitrary. Are there citations? Are there any indications in the household data? Would a temperature of (say) 450 K be okay?

We rewrote this part to

*419 profiles are discarded, 311 due to insufficient maximum height, 19 due to missing data and 89 due to unreliable values of temperature and relative humidity.*

Actually, we leave the exact thresholds out, since the nonphysical values are such high that they just exceed all relevant values. Thus, it is not really important which exact value is used.

- I. 74: units should not be in italics

We use now the latex package siunits for all units throughout the manuscript.

- I. 80 latest --> most recent

We have changed it in the manuscript.

- I.83: state explicitly how many levels were used. State the top altitude used. Also the approximate vertical resolution in ERA5 here would be useful to report.

We used the version of ERA5 with 137 model levels, which has an approximate vertical resolution of 300 m in the tropopause region. A more detailed description of the individual model levels can be found here: <https://confluence.ecmwf.int/display/UDOC/L137+model+level+definitions>

We added the information about the vertical resolution to the manuscript.

*In the tropopause region, the vertical resolution is about 300 m.*

- I. 85: “closest grid point” – this is always the same point in the ERA5 grid – correct? This point could explicitly be mentioned.

We clarified this in the manuscript

*For the comparison with the radiosonde data we obtained pseudo-radiosonde profiles, i.e. a vertical column at a fixed grid point. The vertical profile is extracted at the grid point 49.75° N and 7.25° E, which is the closest grid point of ERA5 to the actual location of Idar-Oberstein. (49.69° N and 7.33° E)*

- I. 90: here and elsewhere “the data sets” is used, but it must be made clear that ERA5 and radiosonde is meant. It is likely better to err on the safe side and explicitly state what is meant.

We have made it clearer throughout the manuscript.

- I. 91: the “improved statistical analysis” is not obvious from the paper.

We changed the word improved to *straightforward*.

- I. 92: “height” be more precise here, geometric altitude, pressure altitude, geopotential altitude etc., is not the same thing and not available in each data set.

We mean “the geometric altitude  $z$  and corrected this in the manuscript.

- I. 94: citation for the buoyancy speed?

These values were taken directly from the radiosonde data set (which we clarified in the text). However, we included the reference of Xu et al., 2023, where it is pointed out that high-resolution radiosondes, which are used e.g. by the Deutsche Wetterdienst DWD, have a sampling period of approximately 1-2s and a vertical resolution of about 5-10 m, which converts to a speed of approximately  $5 \text{ m s}^{-1}$ .

*Radiosondes use the buoyancy force to ascend, thus the vertical speed and consequently the vertical resolution is not constant. The buoyancy speed of the used radiosondes is ranging from  $2 \text{ m s}^{-1}$  to  $8 \text{ m s}^{-1}$  (with a mean around  $5 \text{ m s}^{-1}$ ), returning a vertical resolution of 4 to 16m, respectively, what is usually recognized as high-resolution data (Xu et al., 2023).*

- I. 96: what is the argument for cubic spline?

We have chosen a cubic spline so that the resulting interpolated radiosonde ascent is continuous with respect to the first derivative of the geometric altitude  $z$ . This is not guaranteed with linear interpolation. Also, splines with higher polynomials ( $>x^3$ ) require higher computing power and offer no advantages over cubic splines in the context of this work.

*The interpolation is performed with a cubic spline, which offers sufficient accuracy for this study.*

- I. 99: “inconsistent with respect to time” is unclear.

What was meant here was that the ERA5 model level is not at a constant geometric height but is dependent on the meteorological conditions at that time. We rewrote the sentence.

*By converting the ERA5 data from a pressure grid to a grid with the geometric height  $z$  the latter grid changes from one point in time to the next with each atmospheric state.*

- I. 99: Which “data set”?

We meant ERA5, which is now clarified in the manuscript.

- I 110: citation for this statement?

Figure 2 of Reutter et al. (2020) shows the vertical profiles of temperature in the upper troposphere and lower stratosphere for the extratropical North Atlantic region, which is similar to the regions of interest in this manuscript. All data points in the reference are below 240 K. We added the reference in the manuscript.

- I. 117: quantify “slightly”

The deviation is less than 0.2% in the temperature regime of this manuscript according to Figure 4 of Murphy & Koop 2005. We added this information in the manuscript.

- Eq. (2): I am not familiar with this approximation; is there a citation? Or an explanation of Eq. (2)? How accurate is Eq. (2)?

The approximation is based on the approximation of the ratio of the molar masses by  $\varepsilon \approx 0.622$ . One can express  $q$  by  $q \approx \varepsilon \frac{p_v}{p}$  with  $p_v$  the water vapour pressure and  $p$  the ambient pressure. This allows to calculate the relative humidity w.r.t ice with the specific humidity

- Eq. (4) is stated here that as an approximation for dry air: this aspect should be made clear here. Make clear what the issue is of wet vs. non wet conditions.

We added some text and a citation about the treatment of moisture for static stability.

*This approximation is working under the assumption of dry air and returns on average too high values for the Brunt-Väisälä-frequency; moisture leads to strong decrease in the static stability, even if no phase change is triggered (Durran and Klemp, 1982). However, a moist, and commonly accepted, analog to dry static stability is still missing, although there are some attempts for a consistent treatment (Peters et al., 2022). Therefore we use dry static stability to ensure comparable results with literature which use the dry approximation (e.g. Gettelman and Wang, 2015; Birner et al., 2002; Birner, 2006; Erler and Wirth, 2011).*

- Eq. (5): I suggest to make clear (here and elsewhere) what  $z$  is – is it geo- potential height in Eq. (5)?

$z$  is the geometric altitude. We made it clear in the manuscript as well.

- l. 155: see also other work (e.g., Reichler et al., 2003; Maddox and Mullendore, 2018) on using the classic WMO tropopause definition for modern, gridded data.

See above, we added an extra section (2.3.1) on the discussion on tropopause definitions. For the sake of readability, we will not show this section in this document. The reader is referred to the manuscript.

- l. 157: be clear about which data sets, “both” is a bit vague

We have made it clear in the manuscript (see also l. 90 and l.99 remark)

- l. 169: which period of the radiosonde data?

The exact used time frame spans from the 1st of January 2011 to the 31th of December 2019 as it is given in Section 2.1

- Fig. 2: This figure is good. I suggest adding some discussion in how-far the sondes and ERA5 do not agree.

We added a short description and a teaser to the more detailed investigation later in the manuscript.

*However, Figure 2 also shows that the results differ between radiosonde and reanalysis data. These differences are mainly based on the vertical resolution of the data sets, which is significantly lower in the case of the ERA5 data than in the radiosonde data. As a result, sharp gradients cannot be resolved as good, as can be seen in particular when looking at  $N^2$ . A detailed comparison between the radiosonde and ERA5 data can be found in Section 3.1.1.*

- l. 172: “Another”? this paper is on the TIL.

You are completely right. We omitted this sentence.

- l. 175: Suggest stating the importance of the TIL earlier in the paper (intro- duction).

We moved this part to the introduction and rewrote the sentence (which was also mentioned in the comment for l. 25).

*Thus, a sharp TIL constitutes a strong transport barrier for trace gases and other parameters like vertical motion. Beyond this the importance of the TIL also lies within the diagnostics of upper troposphere and lower stratosphere (UTLS) structures.*

- l. 177: How is the value of 3 km chosen?

Schmidt et al. (2010) have found maxima of the TIL up to more than 2 km above the tropopause. Due to the large number of profiles from different regions and seasons that we consider from measurements and ERA5, we have decided to set the limit at 3 km above the tropopause.

- I. 182: say which features.

We rewrote this part.

*If one of the features such as  $UT-N_{min}^2$  or  $LS-N_{min}^2$  could not be determined, these profiles were excluded from consideration in this study. This affected 126 profiles, so that in the end 9678 profiles were included in the analysis in this study.*

- Eq. 7:  $p_{500z}$  is an altitude (not a pressure) – the symbol is confusing.

We have changed this variable from  $p_{500z}$  to  $z_{p500}$  to make clear that it is an altitude.

- sec. 3.1.1: be clear what is compared with what.

By introducing the new measure of average absolute difference, we also rewrote large parts of this section with your advice in mind.

- I. 211: stating (e.g.) “upper troposphere” is not enough here, the exact range  $z' - z_0$  that was used should be reported.

We provided this information in the manuscript.

- I. 220: are ---> is

We have corrected this.

- I. 223: quantify “thin”

We omitted the word “thin” and added numbers in the manuscript

*(approximately between  $z = 0$  m to  $z = 500$  m)*

- I. 226: do you really want to give three significant figures here?

We reduced the precision of the given values to two decimal places.

- I. 241: is this statement consistent what is shown in Fig. 2?

Since we rewrote the discussion on the differences between the data sets, we omitted this sentence

- I. 244: “averaged” over which region?

*Averaged relative humidity with respect to ice* is the description of the variable  $wRH_i$  (Eq. 7)

averaged accordingly from the geometric height of the 500hPa surface to the TIL height. We added a reference to Eq. 7 to avoid confusion.

- I. 269: I agree, but Fig. 2 also shows the limitations.

Yes, the limitations are mentioned during the description of figure 2.

- I. 272: which “data”?

We have added the information that this is radiosonde and ERA5 data in the text.

- I. 275: Unclear sentence, two times  $wRH_i$ ?

We rewrote the sentence

- I. 275: give the Fig. where the PDF can be seen

We rewrote that sentence.

*We find in Fig. 8 that the probability density function (PDF) of the TIL strength is correlated with higher values of averaged relative humidity with respect to ice ( $wRH_i$ ).*

- I. 286: report the latitude range for which the comparison is valid.

We added the information.

*[...]thus, the next step is to investigate three additional regions representative for northern hemisphere extratropics at a similar latitude with different meteorological conditions but at different longitudes.*

- I. 289: resolution or vertical resolution?

We mean the **vertical** resolution and clarified this in the text.

- I. 291: again, point to the figure in question here, merge with the next sentence (we show). . .

We rewrote this part

*In addition to the strength of the TIL, we show in Fig. 9 distributions of the TIL depths  $dTIL$  distributed into different classes of averaged relative humidity with respect to ice  $wRH_i$ . Here, the depth of the TIL also shows a correlation with  $RH_i$  which is discussed in this section.*

- I. 293: “the TIL depth  $dTIL$  is shifted to lower values” – this is clear from Fig.9. But then (I. 294) “the depth of the TIL is always in the range” – so does  $DTIL$  change with humidity or not? Where would I see the “second mode”? In 9b? More help for the reader? I find this discussion somewhat confusing here.

We added some text for clarification and tried to make our arguments clear.

- I. 296: it is not clear why there is an “artefact” here and what this implies.

The form and existence of the double modes depend on the limit values of the categories. Without classification, there are no double modes. If one shifts the limit values slightly, then modes appear and disappear. With more categories, the double modes can be eliminated, but we wanted to be consistent with  $sTIL$  categories. That is why we decided to use the criterion of three categories with 33% of the data points each for the thresholds.

We rewrote this part to:

*This formation of a double mode is an artefact of the categorization process, in which the aim was to ensure that one third of the data per category was included. These double modes are therefore not of a physical nature.*

- Fig. 9; mention a and b in the caption.

We added the information.

- I. 302: “sharpening the TIL . . . depth” – do you have an argument why?

We added some text, however, the interpretation remains difficult.

- I. 306: state here immediately which three regions. I think the main point is longitudinal variation here.

We add the longitudinal variation.

- I. 328: 328: “to act” → “acts”

We have corrected this.

- I. 337: give section/figures for “previous findings”

we added the reference.

- I. 340: quantify the “differences” found here

We included following part in the manuscript

*Within the first 3 km above the tropopause the static stability is on average  $0.48 \cdot 10^{-4} s^{-1}$  in spring compared to autumn and  $0.22 \cdot 10^{-4} s^{-1}$  higher in winter compared to summer*



- I. 348: is this true? I do not see the strong increase in RH<sub>i</sub> in Fig. 2

You are right, we rewrote this sentence.

*At the same time, there is a strong increase in RH<sub>i</sub> above the first km above the tropopause.*

- I. 354: “could be due” sounds rather speculative.

We agree. We added a reference, to support this and reformulated that part in the manuscript.

By design the central USA location was introduced to include a region of frequent deep convection in the extratropics. There, significantly higher CAPE values are present in the summer months compared to the other regions (Taszarek et al., 2021), indicating greater deep convection activity. This leads to a stronger seasonal cycle in the vertical profiles in this region.

- I. 366: do both “effects” have similar time scales? Would this not be important?

We added some text. However, a timescale analysis is beyond the scope of the study.

The evolution of baroclinic instabilities takes place within days, whereas radiative processes might act on time scales up to few days (if the water vapor concentration is not changed drastically in between). However, cloud processes might act on much shorter scales (minutes to hours). Thus, a clear attribution remains difficult or even impossible.

- I. 373: compared

We have corrected this.

- I. 375: confused about “polar” and “summer” in this sentence

We refer here to Fig. 6 of Randel et al. (2007) stating that “Over polar regions, the maximum in N<sub>2</sub> above the tropopause is substantially stronger in the summer hemisphere.”

- I. 378: maximum in what?

We made it clear in the manuscript.

*The region over the Northern Pacific (Fig. 12c) shows a maximum of sTIL values in the winter and spring months, and a similar minimum in autumn and summer.*

- I. 381: what are the time scales in question here? Should not be forgotten.

See comment above (I.366)

- I. 384: amplitude yes, but what about time scales?

See comment above (I.366)

- I386: really “upper troposphere”? That means below the tropopause?

The “upper troposphere” is related to the mean moisture, which is expressed with wRH<sub>i</sub>. We clarified this in the manuscript.

*Altogether, consideration of seasonal and geographic differences reveals the overall robust relationship between the strength of TIL and average humidity with respect to ice in the upper troposphere (wRH<sub>i</sub>).*

- I. 387: “different” sounds vague here.

The differences are discussed in Section 3.3

- I. 391: give latitude and longitude of Idar-Oberstein, give length of the time period

We added this information in the manuscript.

*The example of the long-term series of radiosonde measurements at the Idar-Oberstein station (Germany, 49.69° N, 7.33° E) of the German Weather Service clearly showed that the strength of the TIL is strongly related to the relative humidity in the upper troposphere.*

- I. 393: same location is not clear; ERA5 does not have a grid point at Idar-Oberstein.

We use the grid point at 49.75N, 7.25E. We clarified this in the manuscript.

*This can be seen not only in the spatially high-resolution measurement data, but also in the reanalysis data from ERA5 at approximately the same location (ERA5 grid point at 49.75° N, 7.25° E).*

- I. 398: this is not important, but meteorologists typically talk about high temperatures, not warm temperatures.

We corrected this in the manuscript.

- I. 401: at which altitude?

We added the information in the manuscript.

*Regarding the relative humidity, one can see that the model data is slightly moister (approx. 1.2 % RH) compared to the radiosondes in the upper troposphere as well as in the lower stratosphere*

- I. 401: “too stable”: compared to what?

We added the information in the manuscript.

*The static stability profiles show a too stable behaviour in the UT and a too unstable behaviour in the LS of ERA5 compared to the radiosondes.*

- I. 418: provide the code on a web-page, not only “upon request”.

The code is now provided here: <https://zenodo.org/records/10604349>. We added this information in the manuscript.

- I. 420: It would be good to report not only the raw data, but to also create a location where the processed data of this study are available (say TIL strength).

We provided the raw data together with the used software, but we will not provide the processed data.

- I. 427: give correct “spelling” of ECMWF

We corrected *forecasting* to *forecasts*.

- I. 479: correct authors list?

We included the missing name.

- I. 490: give page range for the citation.

We added the page range in the references.

## References

Schmidt, T., J.-P. Cammas, H. G. J. Smit, S. Heise, J. Wickert, und A. Haser. „Observational Characteristics of the Tropopause Inversion Layer Derived from CHAMP/GRACE Radio Occultations and MOZAIC Aircraft Data“. *Journal of Geophysical Research: Atmospheres* 115, Nr. D24 (27. Dezember 2010): 2010JD014284. <https://doi.org/10.1029/2010JD014284>.

Taszarek, M., Allen, J. T., Marchio, M., and Brooks, H. E.: Global climatology and trends in convective environments from ERA5 and rawinsonde data, *npj Climate and Atmospheric Science*, 4, <https://doi.org/10.1038/s41612-021-00190-x>, 2021

Xu, H., Guo, J., Tong, B., Zhang, Jinqiang, Chen, T., Guo, X., Zhang, Jian, Chen, W., 2023. Characterizing the near-global cloud vertical structures over land using high-resolution radiosonde measurements. *Atmos. Chem. Phys.* 23, 15011–15038. <https://doi.org/10.5194/acp-23-15011-2023>
